# Supplementary material
Source: PubMed Central journal article supplement (PMC2998391)
Supplement: NIHMS251410-supplement-Support_Data.pdf [file NIHMS251410-supplement-Support_Data.pdf]

**Supplemental Information for manuscript:**

**Nanomechanics of full-length nebulin:**

**An elastic strain gauge in the skeletal muscle sarcomere**

Vamsi K. Yadavalli, Jeffrey G. Forbes and Kuan Wang\*

Muscle Proteomics and Nanotechnology Section, Laboratory of Muscle Biology,

National Institute of Arthritis and Musculoskeletal and Skin Diseases,

National Institutes of Health, Bethesda, Maryland 20892.

\*- Address correspondence to:

Dr. Kuan Wang B50/Rm1140, LMB, NIAMS, NIH Bethesda, MD 20892 301-496-4097 (phone)

301-402-8566 (fax) [wangk@mail.nih.gov](mailto:wangk@mail.nih.gov)

**Empirical Mode Decomposition**

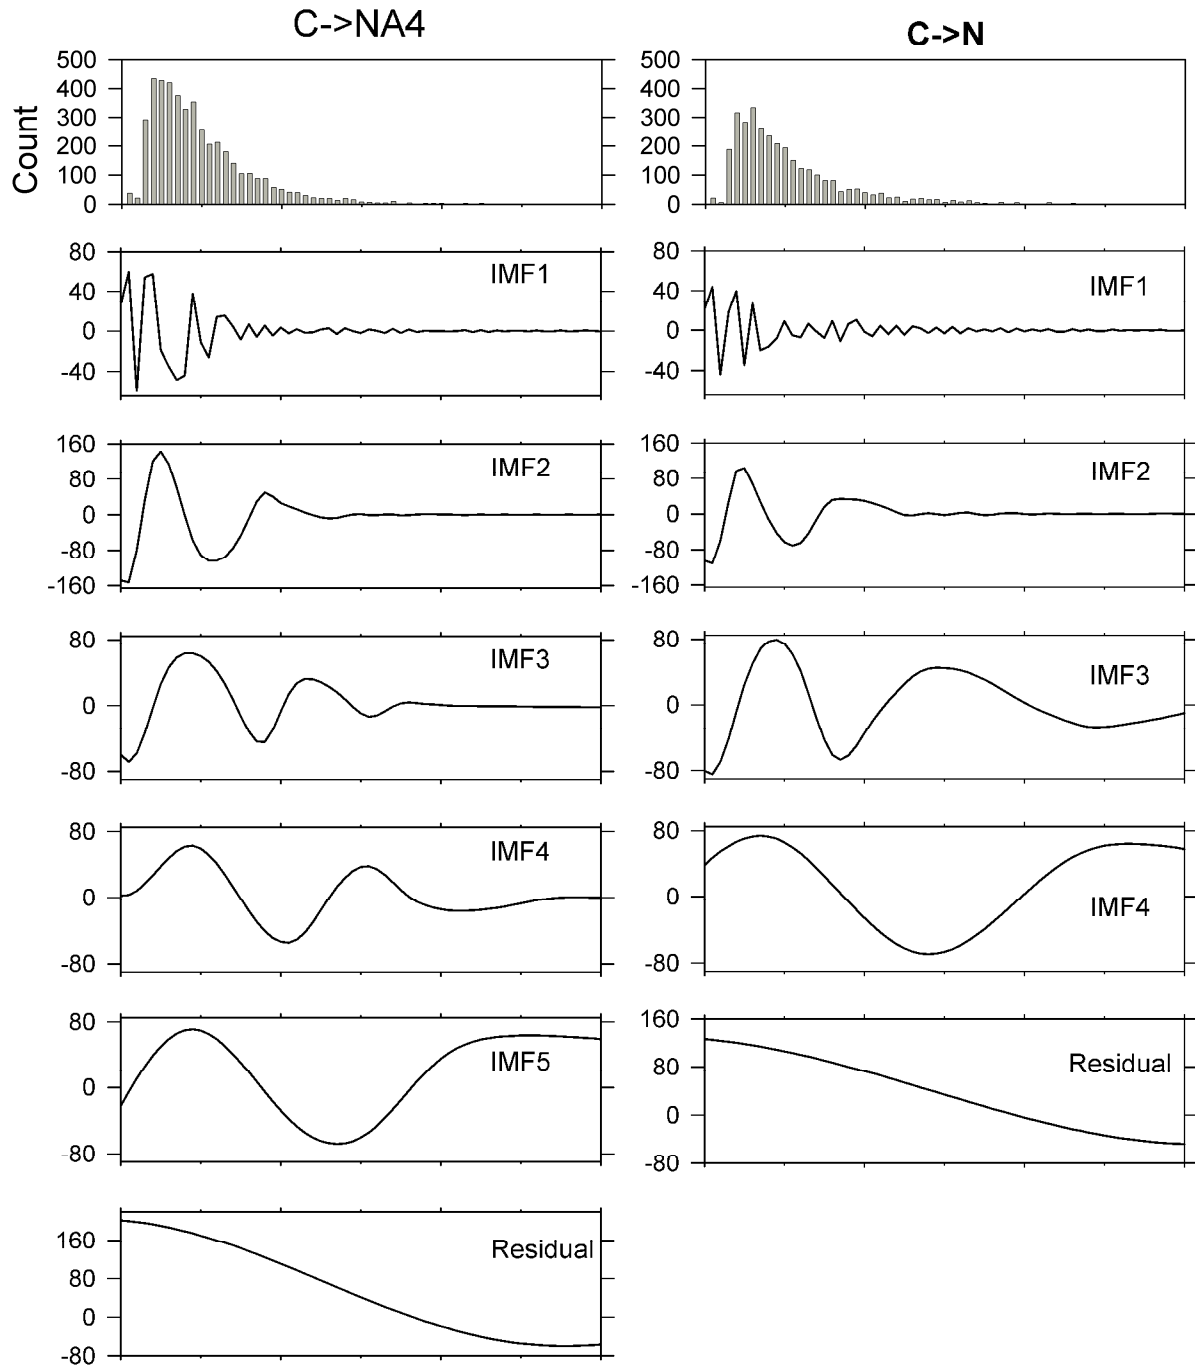

**Figure S1:** Complete set of intrinsic mode functions from the empirical mode decomposition of histograms of peak-to-peak distance histograms.

## AFM Control experiments

Two types of control experiments were performed to validate the experimental design. First, AFM tips, either unmodified or antibodies-attached, were used to probe mixed SAMs after complete hydrolysis or quenching of the NHS reactive groups. Non-specific sticking near low extension was observed in less than 5% of the curves, indicating minimal tip-surface interactions. Second, the antibody-attached tip was used to probe antibody-modified SAM to demonstrate the absence of protein adhesion in the absence of nebulin. Overall, the absence of interfering tip-surface interaction at the low force/low extension region of the force curves greatly facilitates the detection of force signatures.

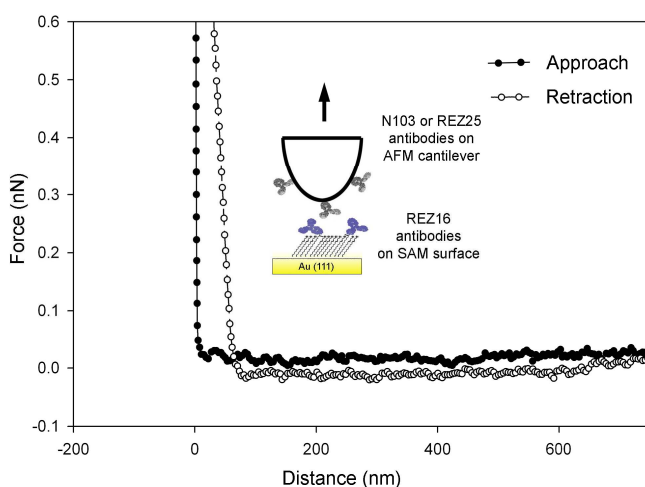

**Figure S2:** The absence of tip-surface interaction between antibody-attached AFM tip and antibody-attached SAM/gold surface. As the cantilever approached and retracted from a surface spa
